# Supplementary material for: Unmasking culprits: novel analysis identifies complement factors as potential therapeutic targets to mitigate inflammation during children's heart surgery
Source: PubMed Central journal article supplement (PMC11657506; doi:10.1186/s40001-024-02156-0), 2024-12-19
Supplement: 40001_2024_2156_MOESM1_ESM.pdf [file 40001_2024_2156_MOESM1_ESM.pdf]

## PICU Discharge Checklist

**Admit Time:**

**Completion Time:**

\*Completion Time is recorded as the time when the final criteria is met.

|                            |                                                                                                                                                                                                                                                                                                                                                                                                                                                                                                                                                                                                                                                                                                                                                                |
|----------------------------|----------------------------------------------------------------------------------------------------------------------------------------------------------------------------------------------------------------------------------------------------------------------------------------------------------------------------------------------------------------------------------------------------------------------------------------------------------------------------------------------------------------------------------------------------------------------------------------------------------------------------------------------------------------------------------------------------------------------------------------------------------------|
| CNS                        | <input type="checkbox"/> Stable neurological status.<br><input type="checkbox"/> No concern about persistent, new, evolving or worsening neurological injury.<br><input type="checkbox"/> Off sedative infusion for at least for 6 hours.<br><input type="checkbox"/> On stable or decreasing IV opioid infusion.                                                                                                                                                                                                                                                                                                                                                                                                                                              |
| CVS                        | <input type="checkbox"/> Improving or stable hemodynamics and perfusion for at least 12 hr.<br><input type="checkbox"/> Stable Rhythm.<br><input type="checkbox"/> Off all cardio active infusions for at least 6 hr.<br><input type="checkbox"/> In case of a chronic heart failure, on a stable infusion of milrinone @ $\leq 0.5$ mcg/kg/min. and not requiring continuous intensive care monitoring.<br><input type="checkbox"/> No concern of persistent, new, evolving or worsening cardiopulmonary function or pathology.<br><input type="checkbox"/> No planned intervention over next 24 hr needing close cardiorespiratory monitoring.<br><input type="checkbox"/> Off arterial line.<br><input type="checkbox"/> Stable on temporary pacemaker.     |
| Respiratory                | <input type="checkbox"/> At least 12-hour post extubation.<br><input type="checkbox"/> Stable respiratory status.<br><input type="checkbox"/> No concern of persistent, new, evolving or worsening lung pathology.<br><input type="checkbox"/> Saturations in acceptable range as per underlying CHD.<br><input type="checkbox"/> Respiratory rate within the normal range l for the age.<br><input type="checkbox"/> No work of breathing/respiratory distress.<br><input type="checkbox"/> On decreasing or stable minimal respiratory support.<br><input type="checkbox"/> Low flow oxygen (0.5 -3 lt/min) via nasal prongs.<br><input type="checkbox"/> On Stable (Max flow 2 lt/kg) or decreasing high flow nasal settings with a plan of long term wean. |
| GI                         | <input type="checkbox"/> Stable GI status.<br><input type="checkbox"/> Tolerating feeds or at least clear fluids.<br><input type="checkbox"/> No need of close monitoring while advancing feeds.<br><input type="checkbox"/> No concern of persistent, new, evolving or worsening GI pathology.                                                                                                                                                                                                                                                                                                                                                                                                                                                                |
| GU                         | <input type="checkbox"/> Acceptable fluid status and urine output ( $> 0.5$ ml/kg) with/out diuretics.<br><input type="checkbox"/> Not on Continuous infusion of diuretics.<br><input type="checkbox"/> No concern of persistent, new, evolving or worsening renal function as indicated by clinical and/or laboratory parameters.                                                                                                                                                                                                                                                                                                                                                                                                                             |
| ID                         | <input type="checkbox"/> No concern of new, evolving, or worsening infection.                                                                                                                                                                                                                                                                                                                                                                                                                                                                                                                                                                                                                                                                                  |
| Hematology                 | <input type="checkbox"/> On stable anticoagulation.<br><input type="checkbox"/> Not on any anticoagulation medication which requires frequent lab and closed clinical monitoring.                                                                                                                                                                                                                                                                                                                                                                                                                                                                                                                                                                              |
| Acid Base and Electrolytes | <input type="checkbox"/> Stable electrolytes parameters with/out supplementation.<br><input type="checkbox"/> Not requiring continuous intravenous infusion of electrolytes.<br><input type="checkbox"/> Acid base status in stable range.<br><input type="checkbox"/> No concern of persistent or new or evolving or worsening acid base status.                                                                                                                                                                                                                                                                                                                                                                                                              |
|                            | <input type="checkbox"/> Discharged by PICU Attending.                                                                                                                                                                                                                                                                                                                                                                                                                                                                                                                                                                                                                                                                                                         |
